# Supplementary material for: Microbial Involvement in Carbon Transformation via CH4 and CO2 in Saline Sedimentary Pool
Source: MDPI journal article supplement (doi:10.3390/biology10080792), 2021-08-17
Supplement: s1 [file s1]

# Supplementary Materials

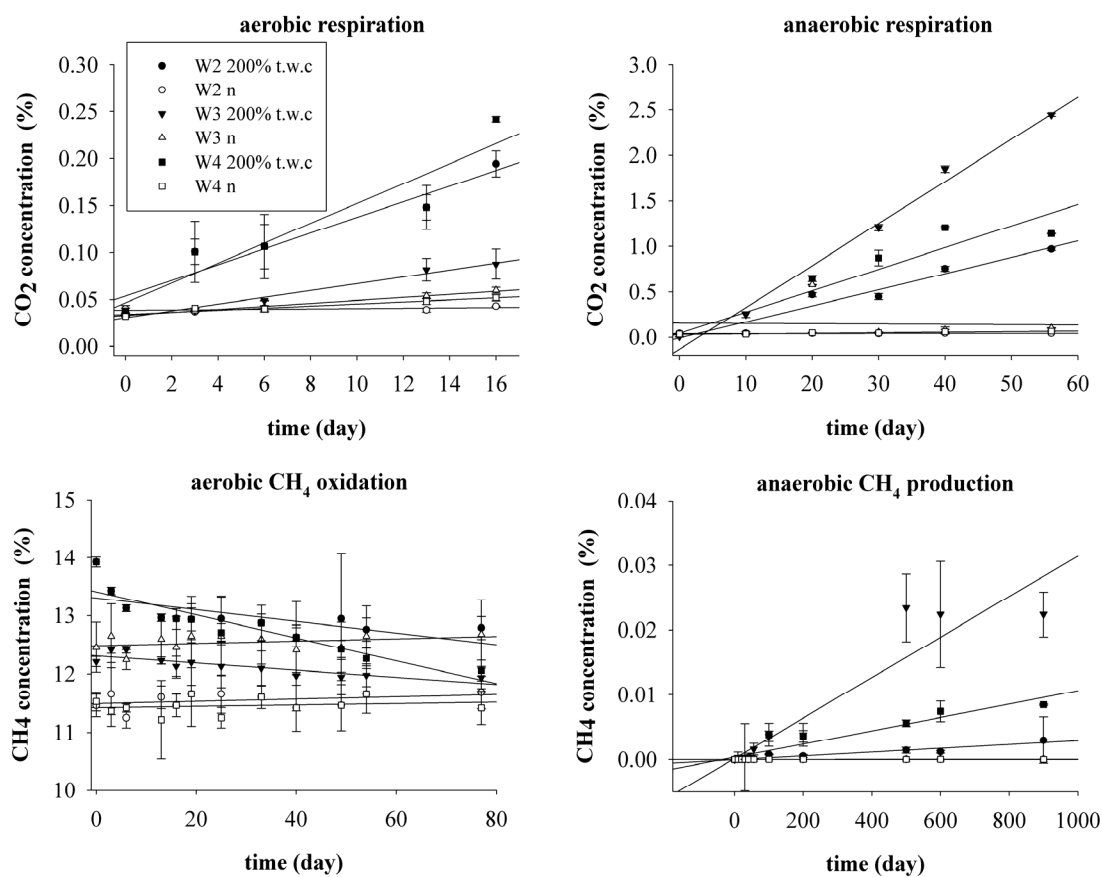

**Figure S1.** Concentration of the CO<sub>2</sub> and CH<sub>4</sub> in marine sediments under different moisture (natural – n and saturated – 200% t.w.c.) and aeration conditions at 20°C (error bars represent standard deviation, n=3).

**Table S1.** Unclassified sequences matched with NCBI database sequences.

| ID                         | NCBI: Description                                 | Accession number | Identity (%) | source                                                                                     |
|----------------------------|---------------------------------------------------|------------------|--------------|--------------------------------------------------------------------------------------------|
| <b>Unclassified_WGW032</b> | Uncultured bacterium                              | LN532098.1       | 100          | Denmark: rapid sand filter material of groundwater treatment for drinking water production |
|                            | Uncultured anaerobic ammonium-oxidizing bacterium | HQ906638.1       | 100          | China: biofilm reactor                                                                     |
|                            | Uncultured anaerobic ammonium-oxidizing bacterium | AB164467.1       | 100          | Japan: anaerobic biological filtrated reactor                                              |
| <b>Unclassified_WGW025</b> | Uncultured bacterium                              | AB775711.1       | 99.75        | Japan: biofilm reactor                                                                     |
|                            | Uncultured bacterium                              | HQ640583.1       | 99.75        | China: ANNAMOX bioreactor                                                                  |
|                            | uncultured anaerobic bacterium                    | KP091461.1       | 98.26        | waste water (Chiny)                                                                        |
| <b>Unclassified_WGW185</b> | Uncultured bacterium                              | MG858442.1       | 100          | Fermented grains (China)                                                                   |
|                            | Uncultured bacterium                              | KF830585.1       | 100          | waste water                                                                                |
|                            | Uncultured organism                               | HQ791754.1       | 100          | human digestive tract                                                                      |
| <b>Unclassified_WGW232</b> | Uncultured bacterium                              | MH531073.1       | 100          | forest soil (New Zealand)                                                                  |
|                            | Uncultured bacterium                              | MF968510.1       | 100          | paddy soil (China)                                                                         |
|                            | uncultured bacterium                              | LT720609.1       | 100          | marine water (Brazil, Atlantic Ocean)                                                      |
| <b>Unclassified_WGW034</b> | uncultured bacterium                              | MG717054.1       | 100          | Mountain forest soil                                                                       |
|                            | uncultured bacterium                              | JN616142.1       | 100          | butterscotch organic ooze from lava                                                        |
|                            | uncultured bacterium                              | LN715677.1       | 99.76        | Fen soil                                                                                   |
| <b>Unclassified_WGW186</b> | Uncultured bacterium                              | HQ640637.1       | 99.5         | ANNAMOX bioreactor                                                                         |
|                            | Uncultured bacterium                              | KC605909.1       | 85.43        | groundwater                                                                                |
|                            | Uncultured bacterium                              | JQ376311.2       | 85.01        | soil                                                                                       |
| <b>Unclassified_WGW035</b> | Uncultured bacterium                              | KF494600.1       | 99.50        | permafrost soil                                                                            |
|                            | Uncultured bacterium                              | MN194919.1       | 98.51        | rhizosphere                                                                                |
|                            | Uncultured bacterium                              | KT790300.1       | 100          | Chiny: rhizosphere                                                                         |
| <b>Unclassified_WGW002</b> | Uncultured bacterium                              | MH524929.1       | 99.06        | forest soil (New Zealand)                                                                  |
|                            | Uncultured bacterium                              | KC620946.1       | 98.83        | pyrite mine (China)                                                                        |
|                            | uncultured <i>Gallionella</i> sp.                 | KU587047.1       | 98.59        | Eastern Siberia open-cast mine, acidic mine drainage (Russia)                              |
|                            | Uncultured bacterium                              | KJ616247.1       | 98.35        | Baltic sea Fe-Mn concretions and sediment                                                  |
| <b>Unclassified_WGW001</b> | Uncultured bacterium                              | LN715646.1       | 99           | Methane-emitting Mire Soils                                                                |
|                            | Uncultured <i>Acidobacteria</i>                   | HQ598923.1       | 99           | woodland soil                                                                              |
|                            | Uncultured bacterium                              | JF301231.1       | 99           | boreal forest soil                                                                         |
| <b>Unclassified_WGW010</b> | Uncultured bacterium                              | MH989759.1       | 100          | paddy soil                                                                                 |
|                            | uncultured <i>Methylocystaceae</i> bacterium      | EF072118.1       | 100          | agriculture soil (USA)                                                                     |
|                            | Uncultured bacterium                              | FJ615931.1       | 100          | agricultural field (USA)                                                                   |
| <b>Unclassified_WGW010</b> | <i>Streptomyces</i> sp.                           | MN093655.1       | 97.04        | pine forest soil                                                                           |

|                                 |                                        |            |       |                                                                 |
|---------------------------------|----------------------------------------|------------|-------|-----------------------------------------------------------------|
| <b>WGW149</b>                   | Uncultured bacterium                   | KC554093.1 | 97.04 | soil of Yanshan Mountain                                        |
|                                 | <i>Pseudonocardiaceae</i><br>bacterium | MH669549.1 | 96.81 | cave silver biofilms (Sanford<br>Underground Research Facility) |
| <b>Unclassified_<br/>WGW077</b> | Uncultured bacterium                   | HQ899249.1 | 99.53 | Eyjafjallajokull lava                                           |
|                                 | Uncultured bacterium                   | FJ532329.1 | 99.53 | PCB-contaminated soil                                           |
|                                 | Uncultured                             |            |       | Elodea nuttallii rhizospheric                                   |
|                                 | <i>Methylophilaceae</i><br>bacterium   | HE648207.1 | 99.29 | mercury contaminated<br>sediments                               |

**Table S2.** *Bacillus* sequences matched with NCBI database sequences. All elected items from NCBI (100% identity, 100% coverage).

| <b>ID</b>           | <b>NCBI: Description</b>              | <b>Accession<br/>number</b> | <b>source</b>                                                                     |
|---------------------|---------------------------------------|-----------------------------|-----------------------------------------------------------------------------------|
| <b>Bacillus_CL1</b> | <i>Bacillus megaterium</i>            | MN133858.1                  | soil                                                                              |
|                     | <i>Bacillus flexus</i>                | MT299641.1                  | sea water, shellfish, and sediment<br>from the north coast of Java<br>(Indonesia) |
|                     | <i>Bacillus flexus</i>                | MT279688.1                  | Benthic Soil, East Kolkata Wetland                                                |
| <b>Bacillus_CL2</b> | <i>Bacillus licheniformis</i>         | MN128072.1                  | Sangameshwar, Tural hotspring<br>(India)                                          |
|                     | <i>Geobacillus stearothermophilus</i> | MH729364.1                  | Compost (India)                                                                   |
|                     | <i>Bacillus</i> sp.                   | MK120089.1                  | Salt (Turkey)                                                                     |
| <b>Bacillus_CL3</b> | <i>Bacillus marisflavi</i>            | MT510150.1                  | Sea sediment (South Korea)                                                        |
|                     | <i>Bacillus haikouensis</i>           | MT299665.1                  | sea water, shellfish, and sediment<br>from the north coast of Java<br>(Indonesia) |
|                     | <i>Bacillus</i> sp.                   | MT437013.1                  | Baiyangdian Lake sediment<br>(China)                                              |
|                     | <i>Bacillus paramycoides</i>          | MN134492.1                  | Caves (India)                                                                     |
| <b>Bacillus_CL4</b> | <i>Bacillus toyonensis</i>            | MN134491.1                  |                                                                                   |
|                     | <i>Bacillus</i> sp.                   | MN128021.1                  | Coalmine soil (India)                                                             |
|                     | <i>Bacillus anthracis</i>             | MN122435.1                  | Saline source (India)                                                             |
|                     | <i>Bacillus cereus</i>                | LC487876.1                  | Seawater (India)                                                                  |
| <b>Bacillus_CL5</b> | <i>Bacillus</i> sp.                   | MK421402.1                  | Lithium brines (Chile)                                                            |
|                     | <i>Bacillus altitudinis</i>           | MT373595.1                  | Stalactite (caves in Hungary)                                                     |
|                     | <i>Bacillus stratosphericus</i>       | MW131050.1                  | surface of the Mars Science<br>Laboratory                                         |
|                     | <i>Bacillus aerius</i>                | MW199095.1                  | Wetland sediments (India)                                                         |
| <b>Bacillus_CL6</b> | <i>Bacillus mesonae</i>               | MN511751.1                  | Bamboo Rhizosphere                                                                |
|                     | <i>Bacillus drenthensis</i>           | HQ857753.1                  | soil                                                                              |
|                     | <i>Bacterium</i> HN1-10-48            | JN118011.1                  | flooded paddy soil                                                                |
